# Supplementary material for: Specific detection of tau seeding activity in Alzheimer’s disease using rationally designed biosensor cells
Source: PubMed Central journal article supplement (PMC10408046; doi:10.1186/s13024-023-00643-2), 2023-08-08
Supplement: 13024_2023_643_MOESM1_ESM.pdf [file 13024_2023_643_MOESM1_ESM.pdf]

|           |                                         | <b>AUC</b><br>[%FRET-positive x pg] | <b>CI 95%</b>    |
|-----------|-----------------------------------------|-------------------------------------|------------------|
| Figure 1B | <i>Fusion</i>                           | 2093                                | 1360 to 2826     |
|           | <i>(EAAAK)<sub>3</sub></i>              | 3499                                | 2549 to 4449     |
|           | <i>(GGGGS)<sub>3</sub></i>              | 49,31                               | 0.000 to 102.5   |
|           | <i>GGSGGSGG</i>                         | 301,1                               | 165.8 to 436.3   |
|           | <i>CRL-3275 construct</i>               | 879,7                               | 762.8 to 996.6   |
| Figure 1C | <i>Fusion</i>                           | 94556                               | 61809 to 127302  |
|           | <i>Fusion 3xKQ</i>                      | 338821                              | 298021 to 379622 |
|           | <i>(EAAAK)<sub>3</sub></i>              | 116326                              | 80231 to 152421  |
|           | <i>(EAAAK)<sub>3</sub> 3xKQ</i>         | 468385                              | 387640 to 549131 |
| Figure 1E | <i>HEK293T (EAAAK)<sub>3</sub> 3xKQ</i> | 534984                              | 473314 to 596653 |
|           | <i>HEK293T Fusion 3xKQ</i>              | 208033                              | 170660 to 245407 |
|           | <i>CRL-3275 cells</i>                   | 223364                              | 181930 to 264798 |

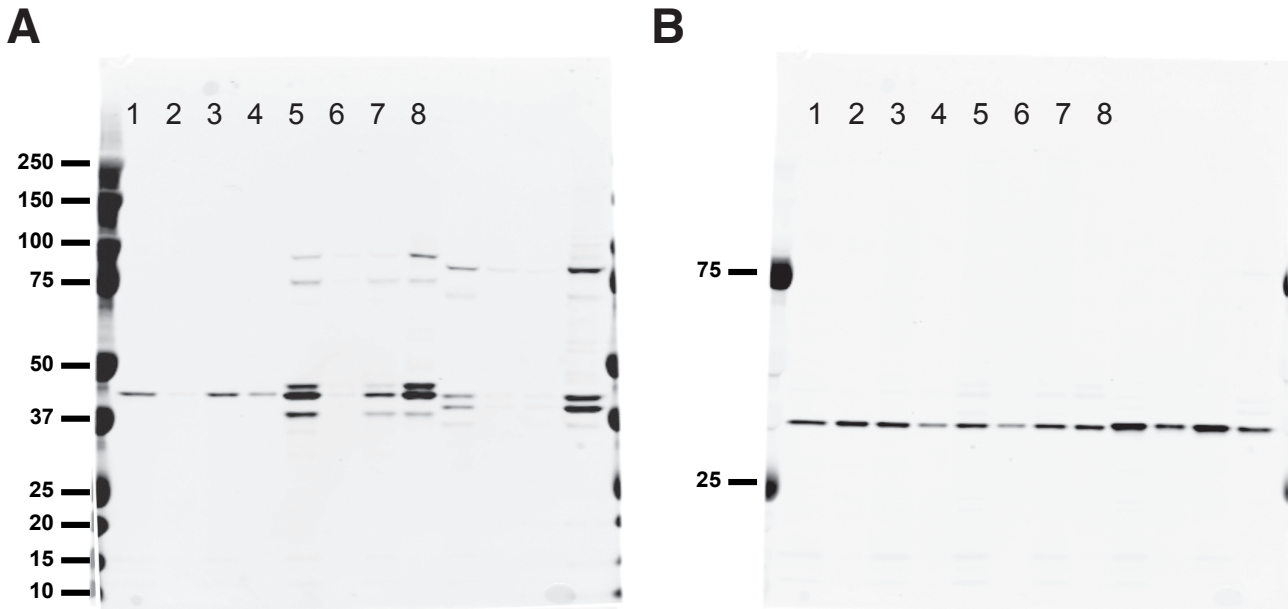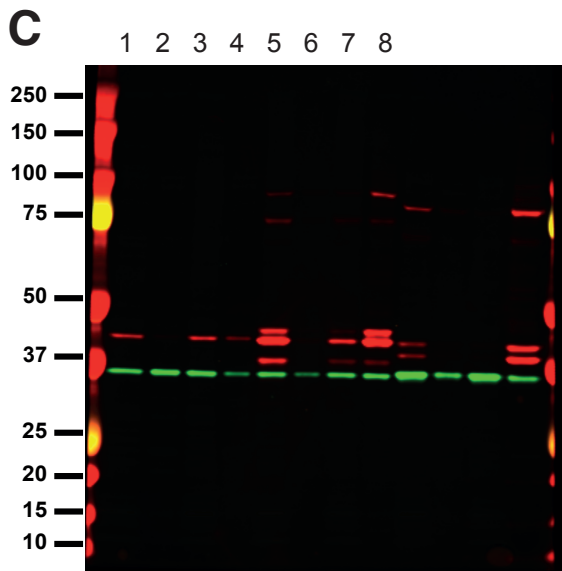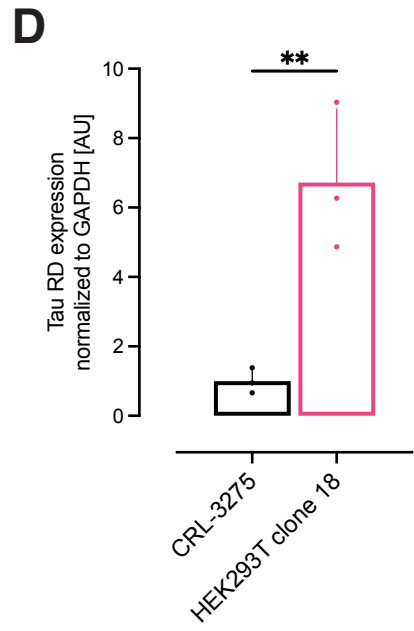

Supplementary Figure 1

**A**

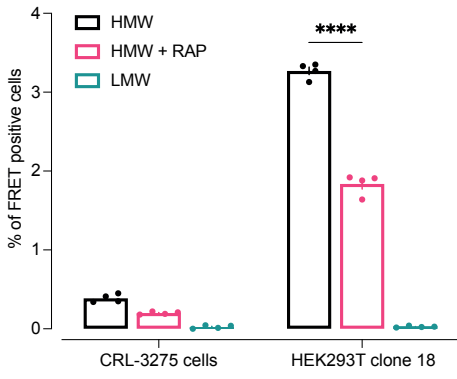

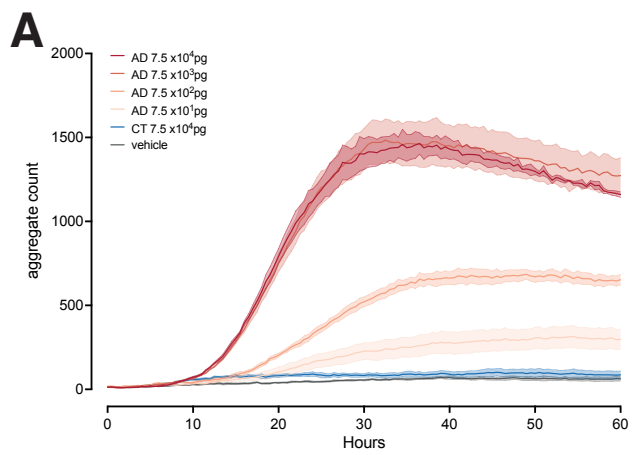

| Case                   | Age at Death | Sex    | Neuropathological Diagnosis                          | Braak stage | Thal stage | ADNC A | ADNC B | ADNC C |
|------------------------|--------------|--------|------------------------------------------------------|-------------|------------|--------|--------|--------|
| <i>AD1</i>             | 61           | Female | Alzheimer's Disease Neuropathological Changes (ADNC) | VI          | 5          | 3      | 3      | 3      |
| <i>AD2</i>             | 77           | Female | Alzheimer's Disease Neuropathological Changes (ADNC) | VI          | 5          | 3      | 3      | 3      |
| <i>AD3</i>             | 77           | Male   | Alzheimer's Disease Neuropathological Changes (ADNC) | VI          | 5          | 3      | 3      | 3      |
| <i>AD4</i>             | 91           | Male   | Alzheimer's Disease Neuropathological Changes (ADNC) | V           | 5          | 3      | 3      | 2      |
| <i>AD5</i>             | 93           | Male   | Alzheimer's Disease Neuropathological Changes (ADNC) | IV          | 4          | 3      | 2      | 1      |
| <i>AD6</i>             | 77           | Female | Alzheimer's Disease Neuropathological Changes (ADNC) | IV          | 4          | 3      | 2      | 1      |
| <i>AD7</i>             | 96           | Female | Alzheimer's Disease Neuropathological Changes (ADNC) | IV          | 4          | 3      | 2      | 2      |
| <i>AD8</i>             | 89           | Male   | Alzheimer's Disease Neuropathological Changes (ADNC) | IV          | 4          | 3      | 2      | 3      |
| <i>PSP1</i>            | 72           | Male   | Progressive supranuclear palsy                       | NA          | NA         | NA     | NA     | NA     |
| <i>PSP2</i>            | 77           | Female | Progressive supranuclear palsy                       | NA          | NA         | NA     | NA     | NA     |
| <i>PSP3</i>            | 71           | Female | Progressive supranuclear palsy                       | NA          | NA         | NA     | NA     | NA     |
| <i>CBD1</i>            | 70           | Female | Cortico basal degeneration                           | NA          | NA         | NA     | NA     | NA     |
| <i>CBD2</i>            | 64           | Male   | Cortico basal degeneration                           | NA          | NA         | NA     | NA     | NA     |
| <i>CBD3</i>            | 63           | Female | Cortico basal degeneration                           | NA          | NA         | NA     | NA     | NA     |
| <i>PiD1</i>            | 77           | Male   | Pick's disease                                       | NA          | NA         | NA     | NA     | NA     |
| <i>PiD2</i>            | 72           | Male   | Pick's disease                                       | NA          | NA         | NA     | NA     | NA     |
| <i>PiD3</i>            | 71           | Female | Pick's disease                                       | NA          | 4          | 3      | NA     | 2      |
| <i>CT1</i>             | 73           | Male   | Control                                              | 0           | 2          | 1      | 0      | 1      |
| <i>CT2</i>             | 63           | Male   | Control                                              | 0           | 2          | 1      | 0      | 0      |
| <i>CT3</i>             | 56           | Female | Control                                              | 0           | 1          | 1      | 0      | 0      |
| <i>Low seeder</i>      | 73           | Male   | Alzheimer's Disease Neuropathological Changes (ADNC) | VI          | 4          | 3      | 3      | 3      |
| <i>Moderate seeder</i> | 82           | Male   | Alzheimer's Disease Neuropathological Changes (ADNC) | VI          | 5          | 3      | 3      | 2      |
| <i>High seeder</i>     | 58           | Female | Alzheimer's Disease Neuropathological Changes (ADNC) | VI          | 5          | 3      | 3      | 3      |

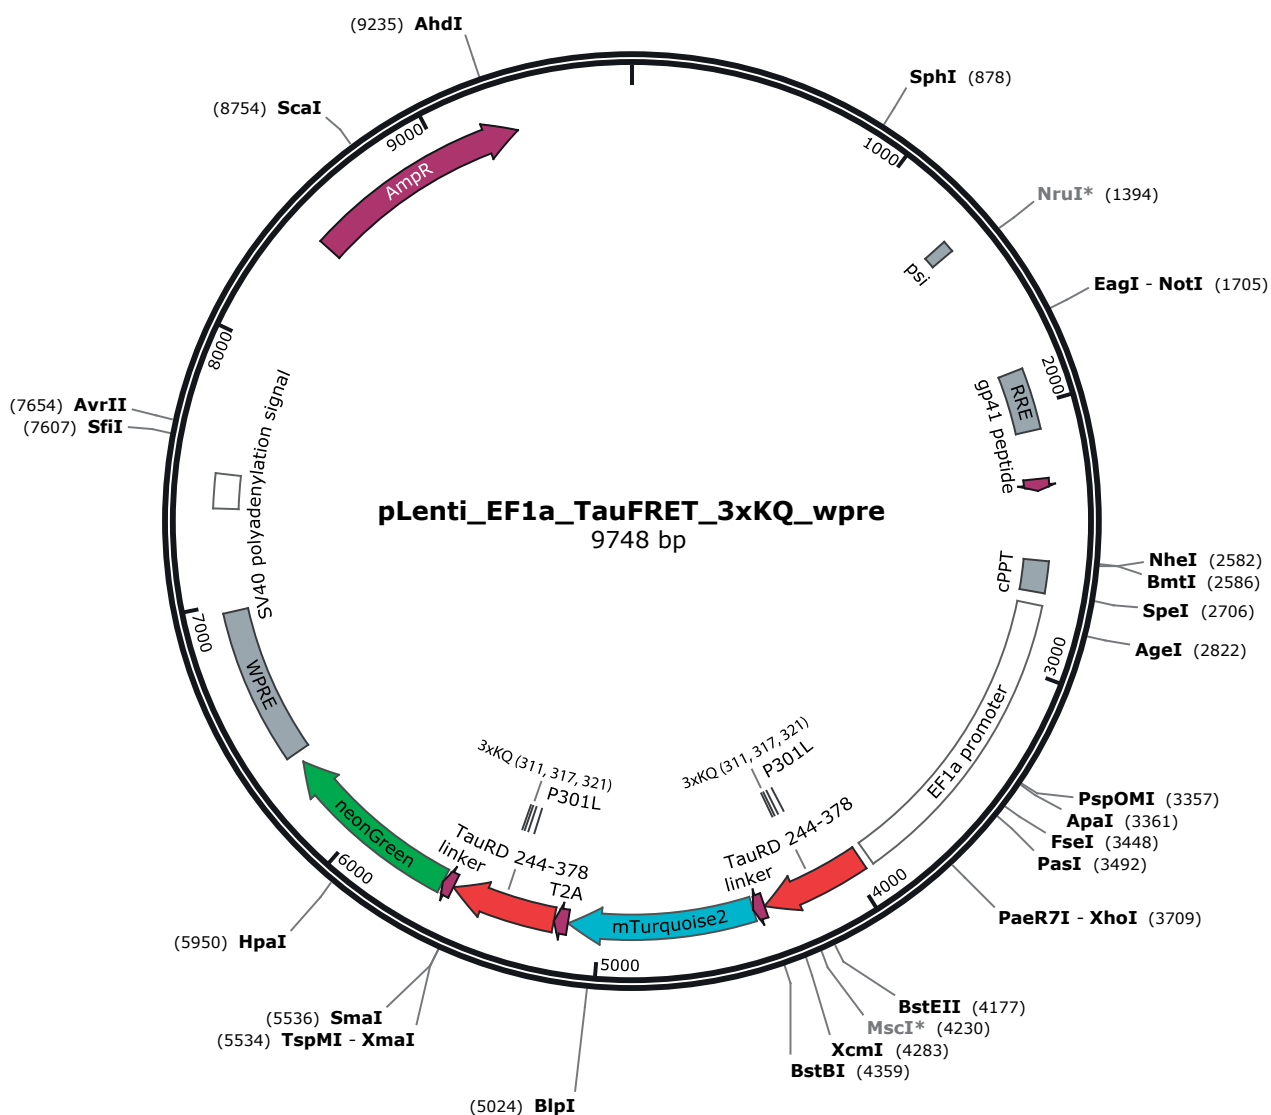

LOCUS pLenti\_EF1A\_TauFRET\_3xKQ\_wpre 9748 bp DNA  
 circular SYN 03-Sep-2020  
 DEFINITION .  
 FEATURES Location/Qualifiers  
     regulatory 1306..1350  
         /regulatory\_class="Other"  
         /label="psi"  
         /note="Retroviral Psi packaging element"  
     regulatory 1860..2093  
         /regulatory\_class="Other"  
         /label="RRE"  
         /note="Rev Response Element"  
     CDS 2278..2322  
         /codon\_start=1  
         /label="gp41 peptide"  
         /note="recognized by the 2H10 single-chain  
 llama nanobody"  
         /product="antigenic peptide corresponding to  
 amino acids 655 to 669 of the HIV envelope protein gp41 (<a  
 href=""https://www.ncbi.nlm.nih.gov/pubmed/  
 23505368"">Lutje  
         Hulsik et al., 2013)"  
         /transl\_table=1  
         /translation="KNEQELLELDKWASL"  
     misc\_structure 2587..2706  
         /label="cPPT"  
         /note="Central Polypurine tract"  
     regulatory 2754..3922  
         /note="EF1a promoter"  
     CDS 3953..4360  
         /note="TauRD 244-378"  
     modified\_base 4127..4129  
         /note="P301L"  
     modified\_base 4157..4159  
         /note="K311Q"  
     modified\_base 4175..4177  
         /note="K317Q"  
     modified\_base 4187..4189  
         /note="K321Q"  
     CDS 4361..4405  
         /note="linker"  
     CDS 4406..5119  
         /note="mTurquoise2"  
     CDS 5120..5173  
         /note="T2A"  
     CDS 5174..5578  
         /note="TauRD 244-378"  
     modified\_base 5345..5347  
         /note="P301L"  
     modified\_base 5375..5377  
         /note="K311Q"  
     modified\_base 5393..5395  
         /note="K317Q"

```

modified_base 5405..5407
                /note="K321Q"
CDS           5579..5623
                /note="linker"
CDS           5624..6331
                /note="neonGreen"
regulatory    6374..6966
                /regulatory_class="Other"
                /label="WPRE"
                /note="Woodchuck Hepatitis Virus
Posttranscriptional
regulatory    Regulatory Element"
                7359..7489
                /regulatory_class="polyA_signal_sequence"
                /label="SV40 pA"
                /note="SV40 polyadenylation signal"
CDS           8448..9308
                /codon_start=1
                /db_xref="GI:455370"
                /gene="bla"
                /label="AmpR"
                /note="E-286"
                /product="beta-lactamase"
                /protein_id="AAB59737.1"
                /transl_table=11
                /

```

```

translation="MSIQHFRVALIPFFAAFLPVAHPETLVKVKDAEDQLGARVGYI
ELDLSNGKILESFRPEERFPMSTFKVLLCGAVLSRVDAGQEQLGRRIHYSQNDLVEYS
PVTEKHLTDGMTVRELCSAAITMSDNTAANLLLTIGGPKELTAFLHNMGDHVTRLDRW
EPELNEAIPNDERDTTTPAAMATTLRKLLTGELLTLASRQQLIDWMEADKVAGPLLRSA
LPAGWFIADKSGAGERGSRGIIAALGPDGKPSRIVVIYTTGSQATMDERNRQIAEIGAS
LIKHW"

```

```

BASE COUNT 2496 A 2408 C 2580 G 2264 T 0 OTHER
ORIGIN

```

```

    1 GTTGGACTCA AGACGATAGT TACCGGATAA GCGCAGCGG TCGGGCTGAA
CGGGGGGTTT
    61 GTGCACACAG CCCAGCTTGG AGCGAACGAC CTACACCGAA CTGAGATACC
TACAGCGTGA
   121 GCTATGAGAA AGCGCCACGC TTCCCGAAGA GAGAAAGGCG GACAGGTATC
CGGTAAGCGG
   181 CAGGGTCGGA ACAGGAGAGC GCACGAGGGA GCTTCCAGGG GGAAACGCCT
GGTATCTTTA
   241 TAGTCCTGTC GGGTTTCGCC ACCTCTGACT TGAGCGTCGA TTTTGTGAT
GCTCGTCAGG
   301 GGGGCGGAGC CTATGGAAAA ACGCCAGCAA CGCGGCCTTT TTACGGTTCC
TGGCCTTTTG
   361 CTGGCCTTTT GCTCACATGT TCTTTCCTGC GTTATCCCCT GATTCTGTGG
ATAACCGTAT
   421 TACCGCCTTT GAGTGAGCTG ATACCGCTCG CCGCAGCCGA ACGACCGAGC
GCAGCGAGTC

```



481 AGTGAGCGAG GAAGCGGAAG AGCGCCCAAT ACGCAAACCG CCTCTCCCCG  
CGCGTTGGCC  
541 GATTCATTAA TGCAGCTGGC ACGACAGGTT TCCCGACTGG AAAGCGGGCA  
GTGAGCGCAA  
601 CGCAATTAAT GTGAGTTAGC TCACTCATT A GGCACCCCAG GCTTTACACT  
TTATGCTTCC  
661 GGCTCGTATG TTGTGTGGAA TTGTGAGCGG ATAACAATTT CACACAGGAA  
ACAGCTATGA  
721 CCATGATTAC GCCAAGCGCG CAATTAACCC TCACTAAAGG GAACAAAAGC  
TGGAGCTGCA  
781 AGCTTAATGT AGTCTTATGC AATACTCTTG TAGTCTTGCA ACATGGTAAC  
GATGAGTTAG  
841 CAACATGCCT TACAAGGAGA GAAAAAGCAC CGTGCATGCC GATTGGTGGA  
AGTAAGGTGG  
901 TACGATCGTG CTTATTAGG AAGGCAACAG ACGGGTCTGA CATGGATTGG  
ACGAACCACT  
961 GAATTGCCGC ATTGCAGAGA TATTGTATTT AAGTGCCTAG CTCGATACAT  
AAACGGGTCT  
1021 CTCTGGTTAG ACCAGATCTG AGCCTGGGAG CTCTCTGGCT AACTAGGGAA  
CCCCTGCTT  
1081 AAGCCTCAAT AAAGCTTGCC TTGAGTGCTT CAAGTAGTGT GTGCCCGTCT  
GTTGTGTGAC  
1141 TCTGGTAACT AGAGATCCCT CAGACCCTTT TAGTCAGTGT GGAAAATCTC  
TAGCAGTGGC  
1201 GCCCGAACAG GGA CTTGAAA GCGAAAGGGA AACCAGAGGA GCTCTCTCGA  
CGCAGGACTC  
1261 GGCTTGCTGA AGCGCGCACG GCAAGAGGCG AGGGGCGGCG ACTGGTGAGT  
ACGCCAAAAA  
1321 TTTTACTAG CGGAGGCTAG AAGGAGAGAG ATGGGTGCGA GAGCGTCAGT  
ATTAAGCGGG  
1381 GGAGAATTAG ATCGCGATGG GAAAAAATTC GGTAAAGGCC AGGGGGAAAG  
AAAAAATATA  
1441 AATTA AAAACA TATAGTATGG GCAAGCAGGG AGCTAGAACG ATTCGCAGTT  
AATCCTGGCC  
1501 TGTTAGAAAC ATCAGAAGGC TGTAGACAAA TACTGGGACA GCTACAACCA  
TCCCTTCAGA  
1561 CAGGATCAGA AGAACTTAGA TCATTATATA ATACAGTAGC AACCTCTAT  
TGTGTGCATC  
1621 AAAGGATAGA GATAAAAGAC ACCAAGGAAG CTTTAGACAA GATAGAGGAA  
GAGCAAAACA  
1681 AAAGTAAGAC CACCGCACAG CAAGCGGCCG CTGATCTTCA GACCTGGAGG  
AGGAGATATG  
1741 AGGGACAATT GGAGAAGTGA ATTATATAAA TATAAAGTAG TAAAAATTGA  
ACCATTAGGA  
1801 GTAGCACCCA CCAAGGCAAA GAGAAGAGTG GTGCAGAGAG AAAAAAGAGC  
AGTGGGAATA  
1861 GGAGCTTTGT TCCTTGGGTT CTTGGGAGCA GCAGGAAGCA CTATGGGCGC  
AGCGTCAATG  
1921 ACGCTGACGG TACAGGCCAG ACAATTATTG TCTGGTATAG TGCAGCAGCA  
GAACAATTTG  
1981 CTGAGGGCTA TTGAGGCGCA ACAGCATCTG TTGCAACTCA CAGTCTGGGG  
CATCAAGCAG  
2041 CTCCAGGCAA GAATCCTGGC TGTGGAAAGA TACCTAAAGG ATCAACAGCT  
CCTGGGGATT

2101 TGGGGTTGCT CTGGAAACT CATTTCACC ACTGCTGTGC CTTGGAATGC  
TAGTTGGAGT  
2161 AATAAATCTC TGGAACAGAT TTGGAATCAC ACGACCTGGA TGGAGTGGGA  
CAGAGAAATT  
2221 AACAAATTACA CAAGCTTAAT ACACTCCTTA ATTGAAGAAT CGCAAAACCA  
GCAAGAAAAG  
2281 AATGAACAAG AATTATTGGA ATTAGATAAA TGGGCAAGTT TGTGGAATTG  
GTTTAACATA  
2341 ACAAATTGGC TGTGGTATAT AAAATTATTC ATAATGATAG TAGGAGGCTT  
GGTAGGTTTA  
2401 AGAATAGTTT TTGCTGTACT TTCTATAGTG AATAGAGTTA GGCAGGGATA  
TTCACCATTA  
2461 TCGTTTCAGA CCCACCTCCC AACCCCGAGG GGACCCGACA GGCCCGAAGG  
AATAGAAGAA  
2521 GAAGGTGGAG AGAGAGACAG AGACAGATCC ATTCGATTAG TGAACGGATC  
TCGACGGTAT  
2581 CGCTAGCTTT TAAAAGAAAA GGGGGGATTG GGGGGTACAG TGCAGGGGAA  
AGAATAGTAG  
2641 ACATAATAGC AACAGACATA CAACTAAAG AATTACAAAA ACAAATTACA  
AAAATTCAAA  
2701 ATTTTACTAG TGATTATCGG ATCAACTTTG TATAGAAAAG TTGGGCTCCG  
GTGCCCGTCA  
2761 GTGGGCAGAG CGCACATCGC CCACAGTCCC CGAGAAGTTG GGGGGAGGGG  
TCGGCAATTG  
2821 AACCGGTGCC TAGAGAAGGT GGC GCGGGGT AACTGGGAA AGTGATGTCG  
TGTA CTGGCT  
2881 CCGCCTTTTT CCCGAGGGTG GGGGAGAACC GTATATAAGT GCAGTAGTCG  
CCGTGAACGT  
2941 TCTTTTTCGC AACGGGTTTG CCGCCAGAAC ACAGGTAAGT GCCGTGTGTG  
GTTCCCGCGG  
3001 GCCTGGCCTC TTTACGGGTT ATGGCCCTTG CGTGCCTTGA ATTACTTCCA  
CCTGGCTGCA  
3061 GTACGTGATT CTTGATCCCG AGCTTCGGGT TGAAGTGGG TGGGAGAGTT  
CGAGGCCTTG  
3121 CGCTTAAGGA GCCCCTTCGC CTCGTGCTTG AGTTGAGGCC TGGCCTGGGC  
GCTGGGGCCG  
3181 CCGCGTGCGA ATCTGGTGGC ACCTTCGCGC CTGTCTCGCT GCTTTCGATA  
AGTCTCTAGC  
3241 CATTTAAAAT TTTTGATGAC CTGCTGCGAC GCTTTTTTTC TGGCAAGATA  
GTCTTGTA  
3301 TGCGGGCCAA GATCTGCACA CTGGTATTTT GGTTTTTGGG GCCGCGGGCG  
GCGACGGGGC  
3361 CCGTGCGTCC CAGCGCACAT GTTCGGCGAG GCGGGGCCTG CGAGCGCGGC  
CACCGAGAAT  
3421 CGGACGGGGG TAGTCTCAAG CTGGCCGGCC TGCTCTGGTG CCTGGTCTCG  
CGCCGCCGTG  
3481 TATCGCCCCG CCCTGGGCGG CAAGGCTGGC CCGGTCGGCA CCAGTTGCGT  
GAGCGGAAAG  
3541 ATGGCCGCTT CCCGGCCCTG CTGCAGGGAG CTCAAAATGG AGGACGCGGC  
GCTCGGGAGA  
3601 GCGGGCGGGT GAGTCACCCA CACAAAGGAA AAGGGCCTTT CCGTCCTCAG  
CCGTGCTTC  
3661 ATGTGACTCC ACGGAGTACC GGGCGCCGTC CAGGCACCTC GATTAGTTCT  
CGAGCTTTTG

3721 GAGTACGTCG TCTTTAGGTT GGGGGGAGGG GTTTTATGCG ATGGAGTTTC  
CCCACACTGA  
3781 GTGGGTGGAG ACTGAAGTTA GGCCAGCTTG GCACTTGATG TAATTCTCCT  
TGGAATTTGC  
3841 CCTTTTTGAG TTTGGATCTT GGTTCAATTCT CAAGCCTCAG ACAGTGGTTC  
AAAGTTTTTT  
3901 TCTTCCATTT CAGGTGTCGT GACAAGTTTG TACAAAAAAG CAGGCTGCCA  
CCATGCAGAC  
3961 AGCCCCGTGT CCCATGCCAG ACCTGAAGAA TGTCAAATCC AAGATCGGCT  
CCACTGAGAA  
4021 CCTGAAGCAC CAGCCGGGAG GCGGGAAGGT GCAGATAATT AATAAGAAGC  
TGGATCTTAG  
4081 CAACGTCCAG TCCAAATGCG GATCAAAGGA TAATATCAA CACGTCTTGG  
GAGGCGGCAG  
4141 TGTGCAAATA GTCTACCAAC CAGTTGACCT GAGCCAGGTG ACCTCCCAGT  
GTGGCTCATT  
4201 AGGCAACATC CATCATAAAC CAGGAGGTGG CCAGGTGGAA GTAAAATCTG  
AGAAGCTTGA  
4261 CTTCAAGGAC AGAGTCCAGT CGAAGATTGG GTCCCTGGAC AATATCACCC  
ACGTCCCTGG  
4321 CGGAGGAAAT AAAAAGATTG AAACCCACAA GCTGACCTTC GAAGCAGCCG  
CTAAAGAGGC  
4381 CGCTGCGAAG GAAGCCGCAG CAAAAGTGAG CAAGGGAGAA GAGCTGTTCA  
CCGGGGTGGT  
4441 GCCCATCCTG GTCGAGCTGG ACGGCGACGT AAACGGCCAC AAGTTCAGCG  
TGTCCGGCGA  
4501 GGGCGAGGGC GATGCCACCT ACGGCAAGCT GACCCTGAAG TTCATCTGCA  
CCACCGGCAA  
4561 GCTGCCCCTG CCCTGGCCCA CACTCGTGAC CACCCTGTCC TGGGGCGTGC  
AGTGCTTCGC  
4621 CCGTACCCC GACCACATGA AGCAGCACGA CTTCTTCAAG TCCGCCATGC  
CCGAAGGCTA  
4681 CGTCCAGGAG CGCACCATCT TCTTCAAGGA CGACGGCAAC TACAAGACCC  
GCGCCGAGGT  
4741 GAAGTTCGAG GGCACACCC TGGTGAACCG CATCGAGCTG AAGGGCATCG  
ACTTCAAGGA  
4801 GGACGGCAAC ATCCTGGGGC ACAAGCTGGA GTACAACACTAC TTTAGCGACA  
ACGTCTATAT  
4861 CACCGCCGAC AAGCAGAAGA ACGGCATCAA GGCCAACTTC AAGATCCGCC  
ACAACATCGA  
4921 GGACGGCGGC GTGCAGCTCG CCGACCACTA CCAGCAGAAC ACCCCCATCG  
GCGACGGCCC  
4981 CGTGCTGCTG CCCGACAACC ACTACCTGAG CACCCAGTCC AAGCTGAGCA  
AAGACCCCAA  
5041 CGAGAAGCGC GATCACATGG TCCTGCTGGA GTTCGTGACC GCCGCCGGGA  
TCACTCTCGG  
5101 AATGGATGAA CTCTACAAAG AGGGCAGAGG AAGTCTGCTA ACATGCGGTG  
ACGTGCGAGGA  
5161 GAATCCTGGA CCTCAAACCG CGCCCGTCCC GATGCCCGAT CTGAAAAACG  
TGAAAAGCAA  
5221 GATTGGGAGC ACCGAGAATC TGAAACATCA ACCCGGCGGG GGCAAAGTCC  
AGATCATCAA  
5281 CAAGAACTC GACCTGTCCA ATGTGCAAAG CAAGTGTGGG AGCAAAGACA  
ACATCAAGCA

5341 TGTGCTGGGC GGGGGGAGCG TCCAGATCGT GTATCAGCCC GTGGATCTCT  
CCCAGGTCAC  
5401 GAGCCAATGC GGCAGCCTGG GCAATATCCA CCATAAGCCC GGCGGCGGGC  
AAGTCGAGGT  
5461 GAAGAGCGAA AACTGGATT TTAAGGACCG CGTGCAAAGC AAAATCGGCA  
GCCTCGACAA  
5521 CATTACGCAT GTGCCCGGGG GCGGCAACAA GAAGATCGAG ACCCATAAAC  
TCACCTTTGA  
5581 GGCCGCCGCA AAGGAAGCTG CAGCCAAAGA GGCCGCCGCC AAGGTCTCCA  
AAGGCGAGGA  
5641 AGATAACATG GCATCTCTAC CAGCAACACA TGAGTTACAC ATATTTGGGT  
CCATCAATGG  
5701 AGTCGATTTT GACATGGTGG GGCAGGGAAC AGGCAATCCA AATGATGGTT  
ATGAGGAATT  
5761 GAATTTGAAG TCCACAAAAG GAGACCTCCA GTTCTCACCC TGGATTCTGG  
TCCCTCATAT  
5821 TGGGTATGGC TTCCACCAGT ATCTGCCCTA CCCTGACGGG ATGAGCCCTT  
TCCAGGCAGC  
5881 CATGGTAGAT GGCTCTGGCT ACCAAGTCCA TCGAACAATG CAGTTTGAAG  
ATGGTGCCTC  
5941 CCTTACTGTT AACTACCGCT ATACCTACGA GGAAGCCAC ATCAAAGGAG  
AGGCCCAGGT  
6001 GAAAGGGACT GGTTCCTCCG CTGACGGTCC TGTGATGACC AACTCACTGA  
CCGCTGCTGA  
6061 CTGGTGCAGG TCGAAAAAGA CTTATCCCAA TGACAAAACA ATTATCAGTA  
CCTTTAAGTG  
6121 GAGTTACACC ACTGGAAATG GAAAGAGATA CCGGAGCACT GCCAGAACCA  
CGTACACCTT  
6181 TGCCAAGCCA ATGGCGGCTA ACTATCTGAA GAACCAGCCG ATGTACGTGT  
TCCGTAAGAC  
6241 GGAGCTTAAG CACTCTAAAA CCGAACTCAA TTCAAAGAA TGGCAAAAAGG  
CCTTTACAGA  
6301 TGTTATGGGC ATGGACGAGC TGTATAAGTA AGTAAACCCA GCTTTCTTGT  
ACAAAGTGGT  
6361 GATAATCGAA TTCCGATAAT CAACCTCTGG ATTACAAAAT TTGTGAAAGA  
TTGACTGGTA  
6421 TTCTTAACTA TGTTGCTCCT TTTACGCTAT GTGGATACGC TGCTTTAATG  
CCTTTGTATC  
6481 ATGCTATTGC TTCCCGTATG GCTTTCATTT TCTCCTCCTT GTATAAATCC  
TGGTTGCTGT  
6541 CTCTTTATGA GGAGTTGTGG CCCGTTGTCA GGCAACGTGG CGTGGTGTGC  
ACTGTGTTTG  
6601 CTGACGCAAC CCCCACTGGT TGGGGCATTG CCACCACCTG TCAGCTCCTT  
TCCGGGACTT  
6661 TCGCTTTCCC CCTCCCTATT GCCACGGCGG AACTCATCGC CGCCTGCCTT  
GCCCGCTGCT  
6721 GGACAGGGGC TCGGCTGTTG GGCCTGACA ATTCCGTGGT GTTGTCGGGG  
AAGCTGACGT  
6781 CCTTTCCATG GCTGCTCGCC TGTGTTGCCA CCTGGATTCT GCGCGGGACG  
TCCTTCTGCT  
6841 ACGTCCCTTC GGCCCTCAAT CCAGCGGACC TTCCTTCCCG CGGCCTGCTG  
CCGGCTCTGC  
6901 GGCCTCTTCC GCGTCTTCGC CTTCGCCCTC AGACGAGTCG GATCTCCCTT  
TGGGCCGCCT

6961 CCCCGCATCG GGAATTCCCG CGGTTTCGCTT TAAGACCAAT GACTTACAAG  
GCAGCTGTAG  
7021 ATCTTAGCCA CTTTTTAAAA GAAAAGGGGG GACTGGAAGG GCTAATTCAC  
TCCCAACGAA  
7081 GACAAGATCT GCTTTTTGCT TGTACTGGGT CTCTCTGGTT AGACCAGATC  
TGAGCCTGGG  
7141 AGCTCTCTGG CTAACTAGGG AACCCACTGC TTAAGCCTCA ATAAAGCTTG  
CCTTGAGTGC  
7201 TTCAAGTAGT GTGTGCCCGT CTGTTGTGTG ACTCTGGTAA CTAGAGATCC  
CTCAGACCCT  
7261 TTTAGTCAGT GTGGAAAATC TCTAGCAGTA GTAGTTCATG TCATCTTATT  
ATTCAGTATT  
7321 TATAACTTGC AAAGAAATGA ATATCAGAGA GTGAGAGGAA CTTGTTTATT  
GCAGCTTATA  
7381 ATGGTTACAA ATAAAGCAAT AGCATCACAA ATTTACAAA TAAAGCATTT  
TTTTCACTGC  
7441 ATTCTAGTTG TGGTTTGTCC AAACATCA CAATGTATCTTA TCATGTCTGG  
CTCTAGCTAT  
7501 CCCGCCCTA ACTCCGCCA TCCCGCCCCT AACTCCGCC AGTTCGCC  
ATTCTCCGCC  
7561 CCATGGCTGA CTAATTTTTT TTATTTATGC AGAGGCCGAG GCCGCCTCGG  
CCTCTGAGCT  
7621 ATTCCAGAAG TAGTGAGGAG GCTTTTTTGG AGGCCTAGGG ACGTACCCAA  
TTCGCCCTAT  
7681 AGTGAGTCGT ATTACGCGCG CTCACTGGCC GTCGTTTTAC AACGTCTGTA  
CTGGGAAAAC  
7741 CCTGGCGTTA CCCAACTTAA TCGCCTTGCA GCACATCCCC CTTTCGCCAG  
CTGGCGTAAT  
7801 AGCGAAGAGG CCCGCACCGA TCGCCCTTCC CAACAGTTGC GCAGCCTGAA  
TGCGGAATGG  
7861 GACGCGCCCT GTAGCGGCGC ATTAAGCGCG GCGGGTGTGG TGGTTACGCG  
CAGCGTGACC  
7921 GCTACACTTG CCAGCGCCCT AGCGCCCGCT CCTTTCGCTT TCTTCCCTTC  
CTTTCTCGCC  
7981 ACGTTCGCCG GCTTTCCCG TCAAGCTCTA AATCGGGGGC TCCCTTTAGG  
GTTCCGATTT  
8041 AGTGCTTTAC GGCACCTCGA CCCCAAAAAA CTTGATTAGG GTGATGGTTC  
ACGTAGTGGG  
8101 CCATCGCCCT GATAGACGGT TTTTCGCCCT TTGACGTTGG AGTCCACGTT  
CTTTAATAGT  
8161 GGA CTCTTGT TCCAAACTGG AACAACTC AACCCATCT CGGTCTATTC  
TTTTGATTTA  
8221 TAAGGGATTT TGCCGATTC GGCCTATTGG TTA AAAAATG AGCTGATTTA  
ACAAAAATTT  
8281 AACGCGAATT TTAACAAAAT ATTAACGCTT ACAATTTAGG TGGCACTTTT  
CGGGGAAATG  
8341 TGCGCGGAAC CCCTATTTGT TTATTTTTCT AAATACATTC AAATATGTAT  
CCGCTCATGA  
8401 GACAATAACC CTGATAAATG CTTCAATAAT ATTGAAAAAG GAAGAGTATG  
AGTATTCAAC  
8461 ATTTCCGTGT CGCCCTTATT CCCTTTTTTG CGGCATTTTG CCTTCCTGTT  
TTTGCTCACC  
8521 CAGAAACGCT GGTGAAAGTA AAAGATGCTG AAGATCAGTT GGGTGCACGA  
GTGGGTTACA

8581 TCGAACTGGA TCTCAACAGC GGTAAGATCC TTGAGAGTTT TCGCCCCGAA  
GAACGTTTTTC  
8641 CAATGATGAG CACTTTTAAA GTTCTGCTAT GTGGCGCGGT ATTATCCCGT  
ATTGACGCCG  
8701 GGCAAGAGCA ACTCGGTCGC CGCATACT ATTCTCAGAA TGAATTGGTT  
GAGTACTCAC  
8761 CAGTCACAGA AAAGCATCTT ACGGATGGCA TGACAGTAAG AGAATTATGC  
AGTGCTGCCA  
8821 TAACCATGAG TGATAAACT GCGGCCAACT TACTTCTGAC AACGATCGGA  
GGACCGAAGG  
8881 AGCTAACCGC TTTTTTGCAC AACATGGGGG ATCATGTAAC TCGCCTTGAT  
CGTTGGGAAC  
8941 CGGAGCTGAA TGAAGCCATA CCAAACGACG AGCGTGACAC CACGATGCCT  
GTAGCAATGG  
9001 CAACAACGTT GCGCAAATA TTAAGTGGCG AACTACTTAC TCTAGCTTCC  
CGGCAACAAT  
9061 TAATAGACTG GATGGAGGCG GATAAAGTTG CAGGACCACT TCTGCGCTCG  
GCCCTTCCGG  
9121 CTGGCTGGTT TATTGCTGAT AAATCTGGAG CCGGTGAGCG TGGGTCTCGC  
GGTATCATTG  
9181 CAGCACTGGG GCCAGATGGT AAGCCCTCCC GTATCGTAGT TATCTACACG  
ACGGGGAGTC  
9241 AGGCAACTAT GGATGAACGA AATAGACAGA TCGCTGAGAT AGGTGCCTCA  
CTGATTAAGC  
9301 ATTGTAAC GTCAGACCAA GTTTACTCAT ATATACTTTA GATTGATTTA  
AAACTTCATT  
9361 TTTAATTTAA AAGGATCTAG GTGAAGATCC TTTTGTATAA TCTCATGACC  
AAAATCCCTT  
9421 AACGTGAGTT TTCGTTCCAC TGAGCGTCAG ACCCCGTAGA AAAGATCAAA  
GGATCTTCTT  
9481 GAGATCCTTT TTTTCTGCGC GTAATCTGCT GCTTGCAAAC AAAAAACCA  
CCGCTACCAG  
9541 CGGTGGTTTG TTTGCCGGAT CAAGAGCTAC CAACTCTTTT TCCGAAGGTA  
ACTGGCTTCA  
9601 GCAGAGCGCA GATACCAAAT ACTGTTCTTC TAGTGAGCC GTAGTTAGGC  
CACCATTCA  
9661 AGAACTCTGT AGCACCGCCT ACATACCTCG CTCTGCTAAT CCTGTTACCA  
GTGGCTGCTG  
9721 CCAGTGGCGA TAAGTCGTGT CTTACCGG

//
